# Supplementary material for: Improved Mass Spectrometry Assay For Plasma Hepcidin: Detection and Characterization of a Novel Hepcidin Isoform
Source: PubMed Central journal article supplement (PMC3790851; doi:10.1371/journal.pone.0075518), 2013-10-04

**A**

### control chart HiQC 2011 hepcidin-25

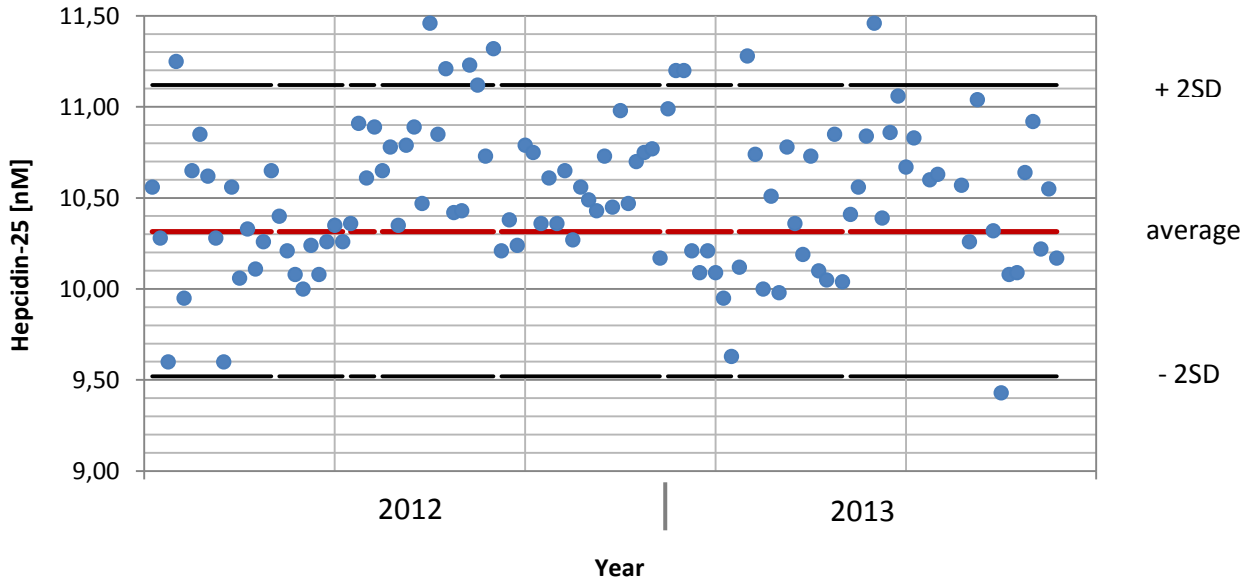

**B**

### control chart HiQC 2009 hepcidin-25

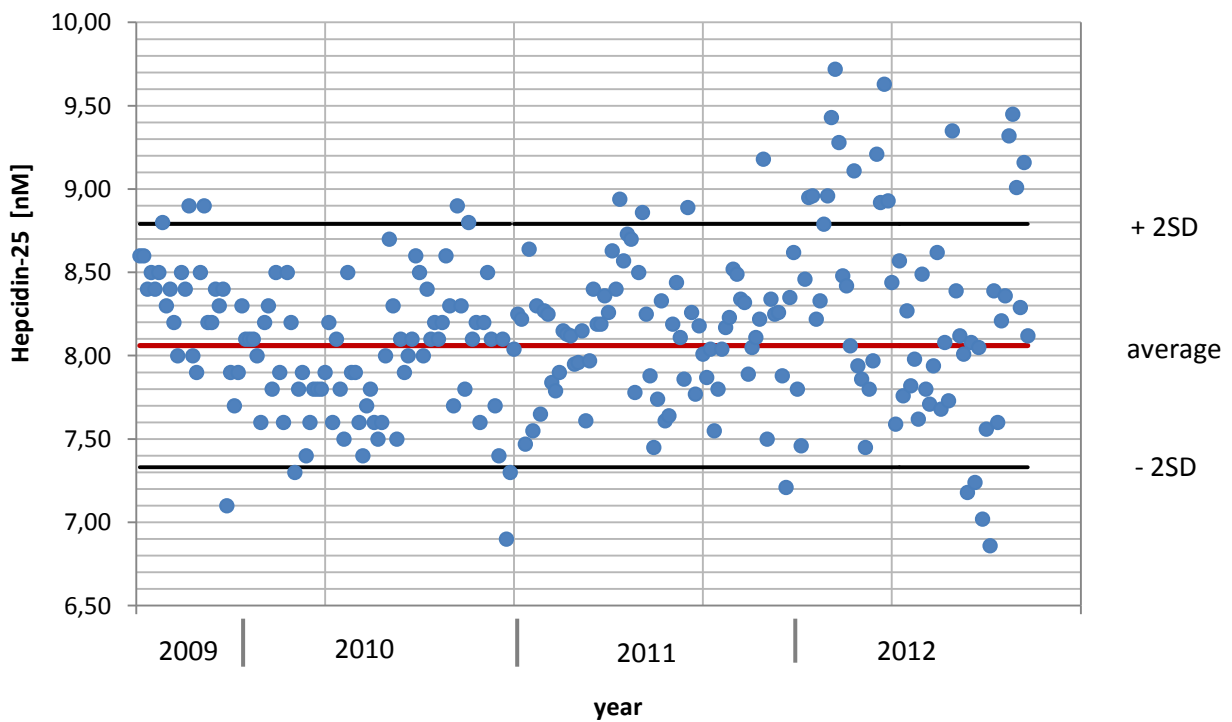

Supplement: pone.0075518.s003.pdf [file pone.0075518.s003.pdf]
